# Supplementary material for: Temperature-induced chiral Ag(i) coordination polymers with structural variation from 1D to 2D: synthesis, luminescence and SHG response
Source: Royal Society of Chemistry journal article supplement (doi:10.1039/c2ce26198g), 2012-01-01
Supplement: c2ce26198g.pdf [file c2ce26198g.pdf]

**ELECTRONIC SUPPLEMENTARY DATA**

for

**Temperature-induced chiral Ag(I) coordination polymers with  
structural variation from 1D to 2D: synthesis, luminescence and SHG  
response**

Lin Cheng,\* Limin Zhang, Qingna Cao, Xiuying Zhang, Shaohua Gou\* and Lei Fang

*Pharmaceutical Research Center and School of Chemistry and Chemical Engineering,  
Southeast University, Nanjing 211189, P. R. China*

E-mail: [cep02chl@yahoo.com.cn](mailto:cep02chl@yahoo.com.cn); [sgou@seu.edu.cn](mailto:sgou@seu.edu.cn)

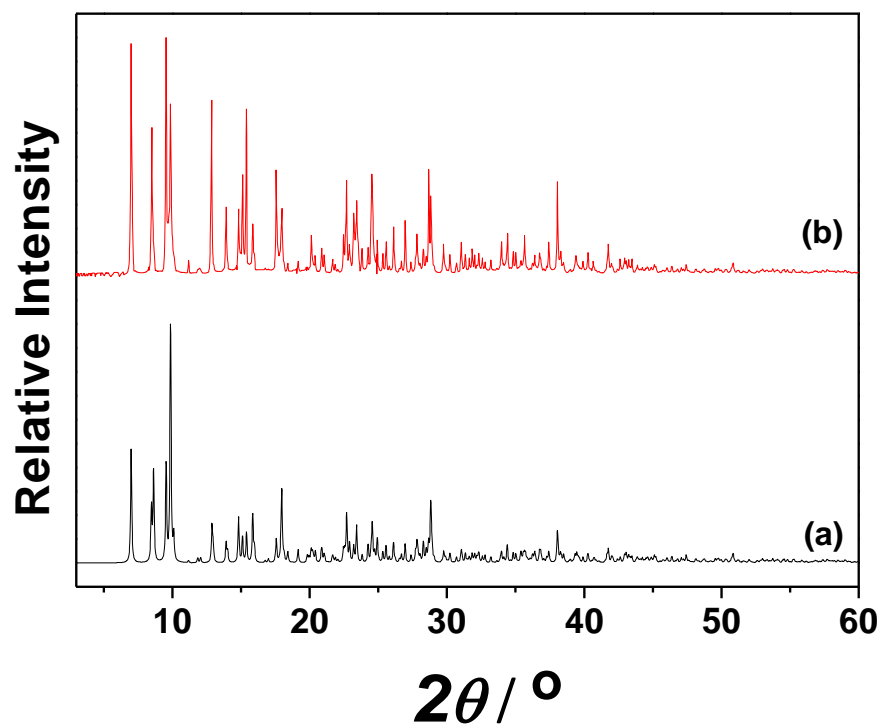

**Figure S1.** The XRD patterns of **1**, simulated from X-ray single crystal data (a) and polycrystalline as newly synthesized (b).

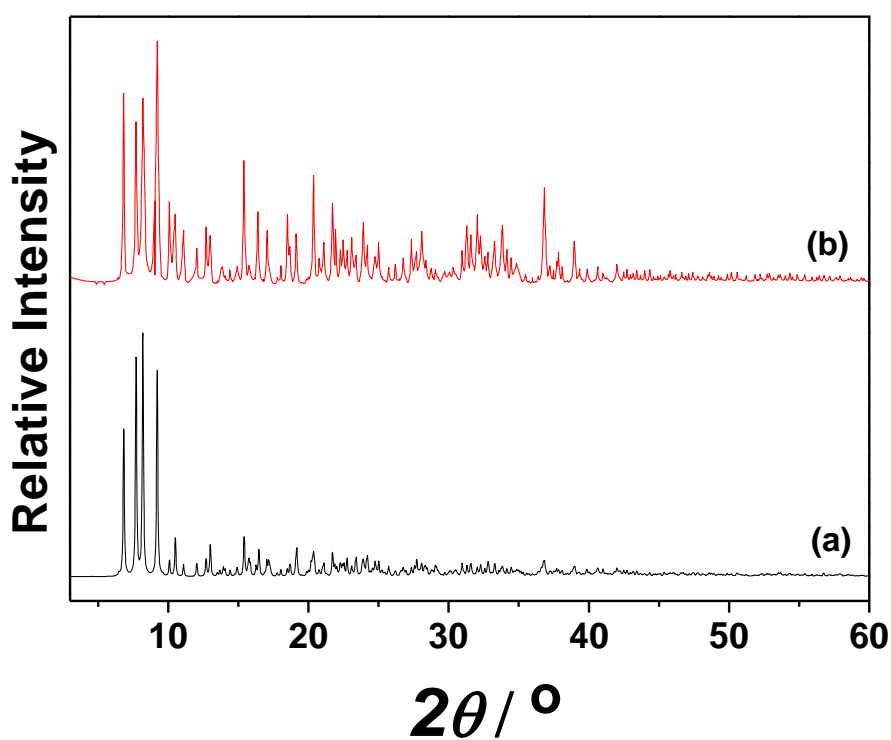

**Figure S2.** The XRD patterns of **2**, simulated from X-ray single crystal data (a) and polycrystalline as newly synthesized (b).

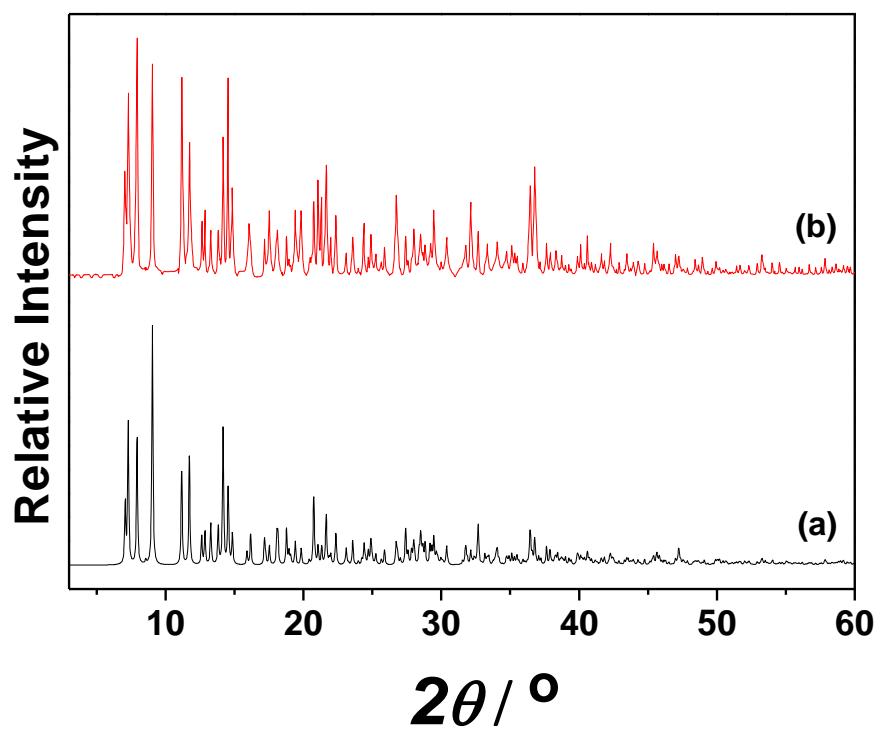

**Figure S3.** The XRD patterns of **3**, simulated from X-ray single crystal data (a) and polycrystalline as newly synthesized (b).

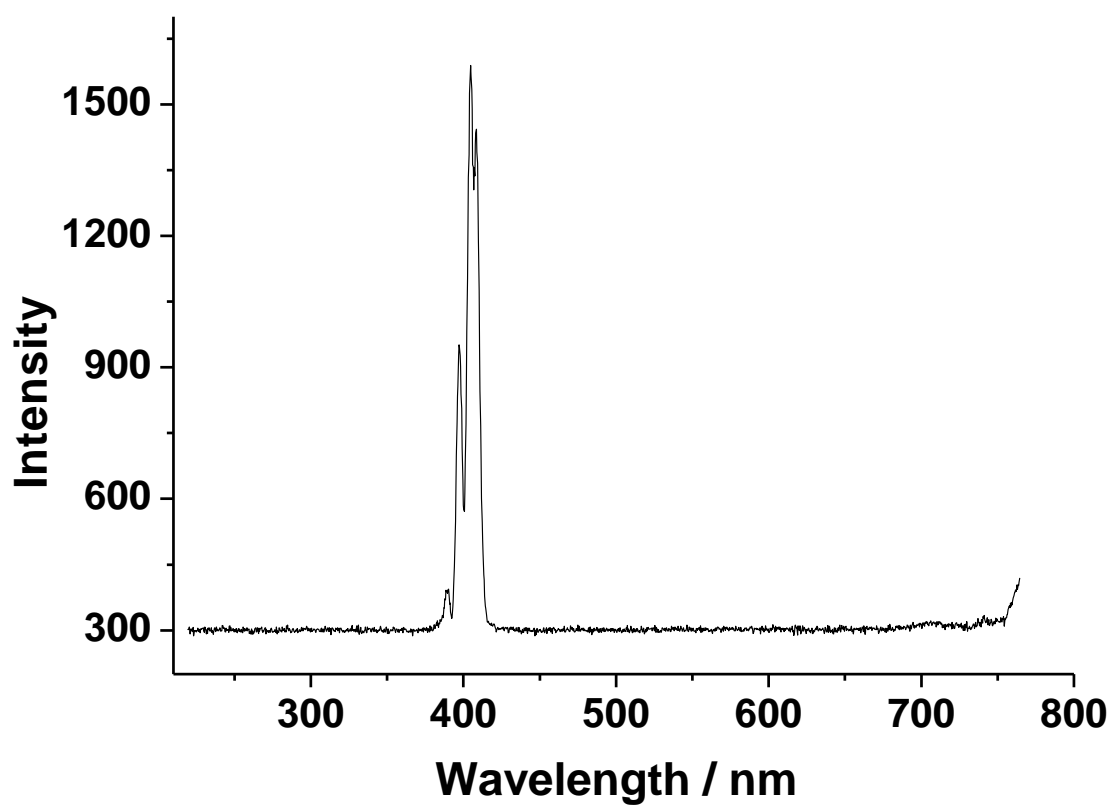

**Figure S4.** SHG spectrum of KDP.

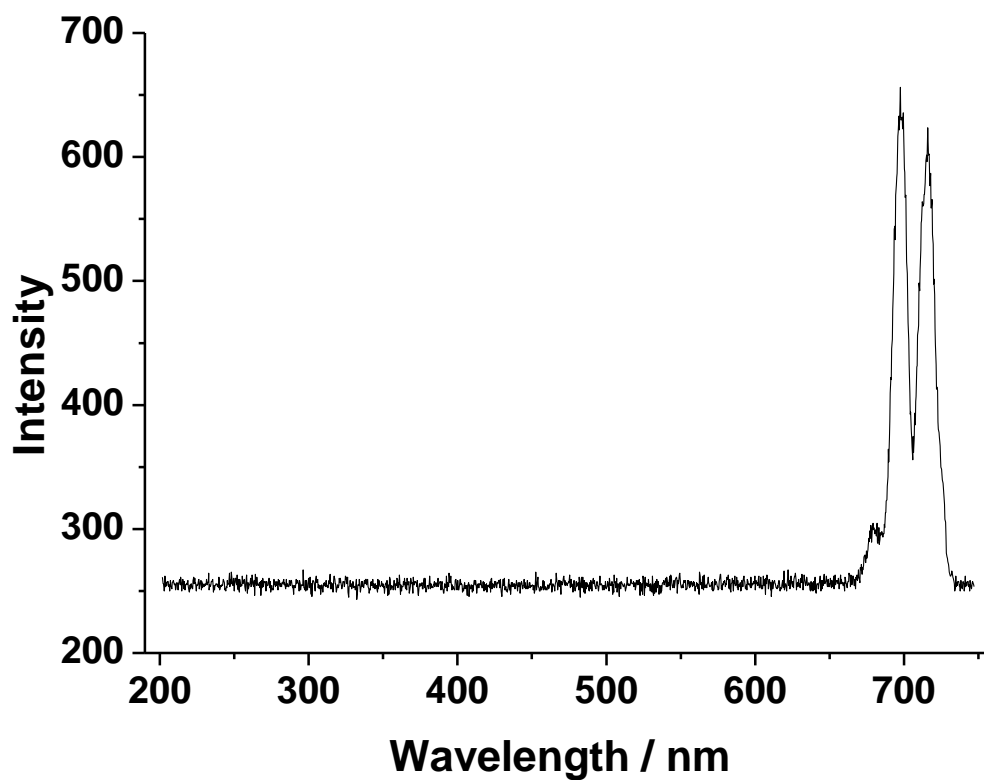

Figure S5. SHG spectrum of 1.

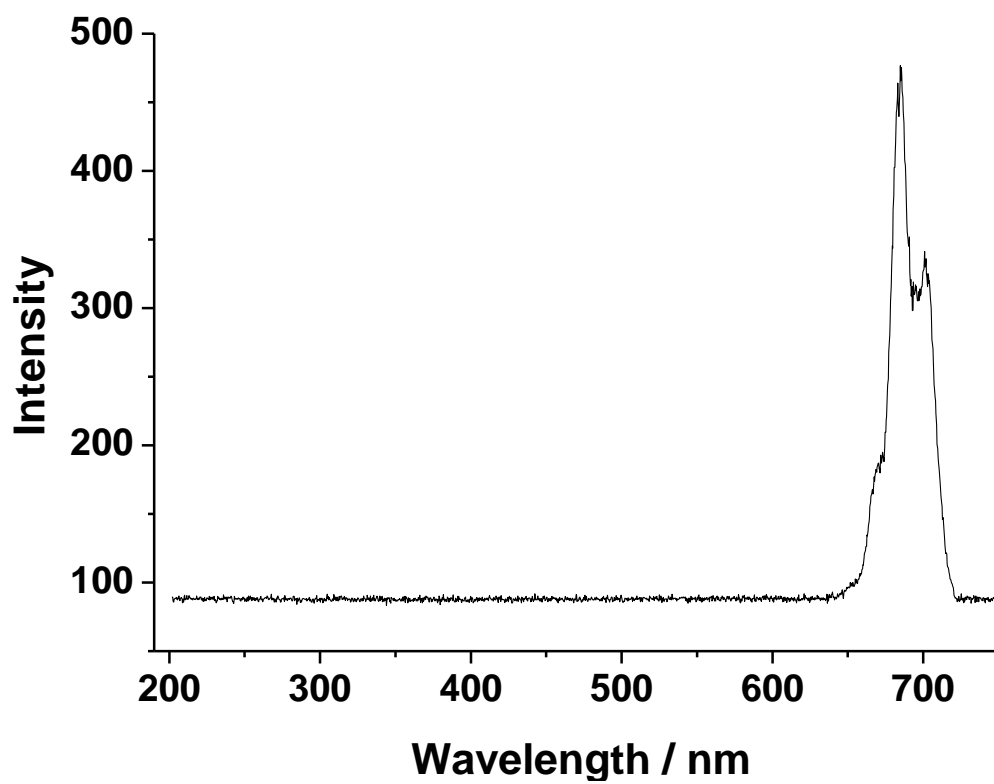

Figure S6. SHG spectrum of 2.

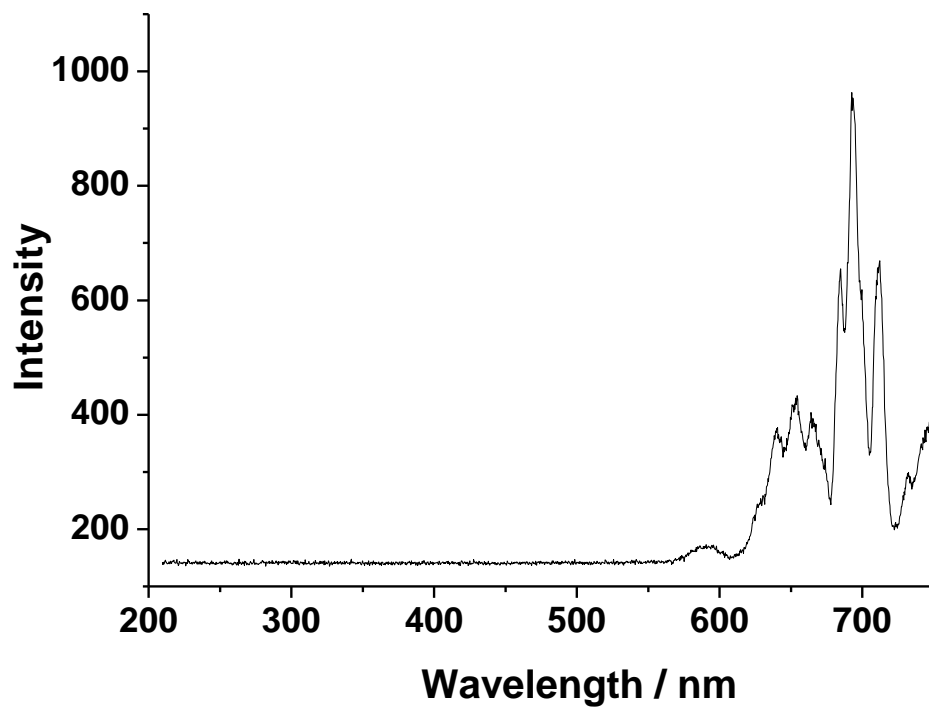

**Figure S7.** SHG spectrum of **3**.

**Table S1.** Selected bond lengths (Å) and angles (°) for **1-3**.

| <b>1</b>    |           |              |           |
|-------------|-----------|--------------|-----------|
| Ag1-N2      | 2.302(8)  | Ag2-N7       | 2.219(8)  |
| Ag1-N3      | 2.307(8)  | Ag3-O1w      | 2.504(9)  |
| Ag1-N5      | 2.173(8)  | Ag3-N4       | 2.205(9)  |
| Ag2-N1      | 2.150(7)  | Ag3-N8a      | 2.154(9)  |
| Ag2-N6      | 2.366(8)  | N2-Ag1-N3    | 76.2(3)   |
| N2-Ag1-N5   | 142.3(3)  | N6-Ag2-N7    | 77.2(3)   |
| N3-Ag1-N5   | 141.5(3)  | O1W-Ag3-N4   | 97.9(3)   |
| N1-Ag2-N6   | 128.9(3)  | O1W-Ag3-N8a  | 106.0(3)  |
| N1-Ag2-N7   | 152.6(3)  | N4-Ag3-N8a   | 156.0(4)  |
| <b>2</b>    |           |              |           |
| Ag1-N2      | 2.391(10) | Ag3-N13      | 2.169(10) |
| Ag1-N3      | 2.262(10) | Ag4-N9       | 2.218(10) |
| Ag1-N5      | 2.150(10) | Ag4-N14      | 2.374(8)  |
| Ag2-N1      | 2.175(10) | Ag4-N15      | 2.281(9)  |
| Ag2-N6      | 2.408(9)  | Ag5-N8       | 2.227(10) |
| Ag2-N7      | 2.244(9)  | Ag5-N12      | 2.254(10) |
| Ag3-N10     | 2.372(10) | Ag5-N4b      | 2.197(10) |
| Ag3-N11     | 2.265(10) | N2-Ag1-N3    | 77.3(3)   |
| N2-Ag1-N5   | 130.5(3)  | N9-Ag4-N14   | 131.1(3)  |
| N3-Ag1-N5   | 151.8(3)  | N9-Ag4-N15   | 152.0(3)  |
| N1-Ag2-N6   | 126.9(4)  | N14-Ag4-N15  | 76.9(3)   |
| N1-Ag2-N7   | 156.8(4)  | N8-Ag5-N12   | 106.4(3)  |
| N6-Ag2-N7   | 76.3(3)   | N4_b-Ag5-N8  | 129.5(4)  |
| N10-Ag3-N11 | 77.8(4)   | N4_b-Ag5-N12 | 122.4(4)  |
| N10-Ag3-N13 | 130.1(3)  | N11-Ag3-N13  | 151.8(4)  |

---

| <b>3</b>  |           |             |           |
|-----------|-----------|-------------|-----------|
| Ag1-N2    | 2.373(18) | Ag2-N7      | 2.365(18) |
| Ag1-N3    | 2.386(18) | Ag3-N4      | 2.39(2)   |
| Ag1-N5    | 2.223(18) | Ag3-N4a     | 2.39(2)   |
| Ag2-N1    | 2.214(19) | Ag3-N8b     | 2.33(2)   |
| Ag2-N6    | 2.285(19) | Ag3-N8d     | 2.33(2)   |
| N2-Ag1-N3 | 74.5(6)   | N4-Ag3-N4_a | 80.4(7)   |
| N2-Ag1-N5 | 155.0(6)  | N4-Ag3-N8b  | 113.7(7)  |
| N3-Ag1-N5 | 130.2(6)  | N4-Ag3-N8d  | 118.3(7)  |
| N1-Ag2-N6 | 141.5(7)  | N4a-Ag3-N8b | 118.3(7)  |
| N1-Ag2-N7 | 140.9(7)  | N4a-Ag3-N8d | 113.7(7)  |
| N6-Ag2-N7 | 76.6(6)   | N8b-Ag3-N8d | 110.1(7)  |

---

Symmetry code for **1**: a, x, y, -1+z. for **2**: b, -x, 1/2+y, 2-z. for **3**: a, 1-x,y,3-z; b, -1/2+x, -1/2+y, z; d, 3/2-x, -1/2+y, 3-z.

**Table S2.** Selected hydrogen bond lengths (Å) and bond angles (°) of **1-3** (D, donor atom; A, acceptor atom).

| D-H...A        | D-H [Å] | H...A [Å] | D...A [Å] | D-H...A [°] |
|----------------|---------|-----------|-----------|-------------|
| <b>1</b>       |         |           |           |             |
| O1w-H1wa...O4w | 0.93    | 2.26      | 3.006(17) | 137         |
| O1w-H1wb...F1c | 0.93    | 1.99      | 2.823(11) | 148         |
| N2-H2wb...O2w  | 0.91    | 2.18      | 3.050(11) | 159         |
| O2w-H2wa...F3c | 0.85    | 2.04      | 2.887(12) | 179         |
| N3-H3b...F6    | 0.91    | 2.18      | 3.070(10) | 167         |
| O2w-H2wb...O3w | 0.85    | 1.90      | 2.745(14) | 179         |
| O3w-H3wa...F10 | 0.85    | 2.05      | 2.822(13) | 152         |
| O3w-H3wb...F8  | 0.85    | 1.98      | 2.830(13) | 179         |
| N6-H6c...F2    | 0.91    | 2.33      | 3.115(11) | 144         |
| O4w-H4wa...F8d | 0.85    | 2.24      | 2.891(16) | 133         |
| N7-H7b...F2    | 0.91    | 2.20      | 3.086(11) | 164         |
| <b>2</b>       |         |           |           |             |
| O1w-H1wa...O4  | 0.83    | 2.19      | 2.93(6)   | 150         |
| O1w-H1wb...O3w | 0.85    | 2.45      | 3.30(7)   | 179         |
| N2-H2b...O1c   | 0.93    | 2.47      | 3.09(2)   | 124         |
| N3-H3b...O1    | 0.90    | 2.19      | 2.949(14) | 142         |



|                 |      |      |           |     |
|-----------------|------|------|-----------|-----|
| O2w-H2wb...O3w  | 0.85 | 2.54 | 3.09(4)   | 123 |
| O4-H4b...F7     | 0.85 | 2.21 | 3.04(3)   | 166 |
| N6-H6c...O3     | 0.91 | 2.38 | 3.117(17) | 138 |
| N7-H7b...F3     | 0.90 | 2.28 | 2.937(13) | 129 |
| N10-H10c...F16  | 0.90 | 2.46 | 3.147(13) | 133 |
| N11-H11c...F10  | 0.90 | 2.20 | 3.070(17) | 160 |
| N14-H14a...F16d | 0.90 | 2.35 | 3.130(12) | 144 |

**3**

|               |      |      |         |     |
|---------------|------|------|---------|-----|
| N2-H2b...F12  | 0.93 | 2.33 | 3.24(3) | 164 |
| N2-H2b...F8d  | 0.93 | 2.43 | 3.22(4) | 143 |
| N3-H3b...F9e  | 0.93 | 2.53 | 3.12(2) | 122 |
| N6-H6c...F3   | 0.93 | 2.40 | 3.10(2) | 133 |
| N7-H7b...F10e | 0.93 | 2.28 | 3.18(2) | 161 |

---

Symmetry code for **1**: c, -x, 1/2+y, -z; d, -1+x, y, z. for **2**: c, -x, -1/2+y, 2-z; d, 1-x, -1/2+y, 3-z; x, x, y, 1+z. for **3**: d, 3/2-x, -1/2+y, 3-z; e, 3/2-x, 1/2+y, 3-z.

**Table S3.** Crystal data and structure Refinement for **4**.

| Compound                                  | <b>4</b>                                |
|-------------------------------------------|-----------------------------------------|
| Formula                                   | $C_{36}H_{48}Ag_{2.5}Cl_{2.5}O_{10}N_8$ |
| <i>FW</i>                                 | 1111.13                                 |
| Crystal system                            | monoclinic                              |
| Space group                               | <i>C</i> 2                              |
| <i>a</i> / Å                              | 23.966(3)                               |
| <i>b</i> / Å                              | 15.116(2)                               |
| <i>c</i> / Å                              | 13.0659(18)                             |
| $\beta$ / °                               | 111.746(1)                              |
| <i>V</i> / Å <sup>3</sup>                 | 4396.5(10)                              |
| <i>Z</i>                                  | 4                                       |
| <i>D<sub>c</sub></i> / g cm <sup>-3</sup> | 1.679                                   |
| <i>T</i> / K                              | 173(2)                                  |
| <i>F</i> (000)                            | 2240                                    |
| $\mu$ / mm <sup>-1</sup>                  | 1.321                                   |
| Flack <i>x</i>                            | -0.04(13)                               |
| <i>R</i> <sub>1</sub> ( <i>I</i> > 2σ)    | 0.0821                                  |
| <i>wR</i> <sub>2</sub> (all data)         | 0.1821                                  |
| GOF                                       | 1.078                                   |

$$^a R_1 = \frac{\sum ||F_o| - |F_c||}{\sum |F_o|}, \quad ^b wR_2 = \left[ \frac{\sum w(F_o^2 - F_c^2)^2}{\sum w(F_o^2)^2} \right]^{1/2}$$

**Table S4.** Selected bond lengths (Å) and angles (°) for **4**.

| <b>1</b>  |          |             |          |
|-----------|----------|-------------|----------|
| Ag1-N2    | 2.32(2)  | Ag2-N7      | 2.34(2)  |
| Ag1-N3    | 2.38(2)  | Ag3-N4      | 2.37(3)  |
| Ag1-N5    | 2.23(2)  | Ag3-N4a     | 2.37(3)  |
| Ag2-N1    | 2.20(2)  | Ag3-N8b     | 2.29(2)  |
| Ag2-N6    | 2.30(2)  | Ag3-N8d     | 2.29(2)  |
| N2-Ag1-N3 | 75.6(7)  | N4-Ag3-N4a  | 79.8(9)  |
| N2-Ag1-N5 | 153.9(8) | N4-Ag3-N8b  | 113.0(9) |
| N3-Ag1-N5 | 130.5(8) | N4-Ag3-N8d  | 119.3(9) |
| N1-Ag2-N6 | 141.0(8) | N4a-Ag3-N8b | 119.3(9) |
| N1-Ag2-N7 | 141.7(8) | N4a-Ag3-N8d | 113.0(9) |
| N6-Ag2-N7 | 76.2(8)  | N8b-Ag3-N8d | 110.0(9) |

Symmetry code: a, 1-x, y, 1-z; b, -1/2+x, -1/2+y, z; d, -1/2-x, -1/2+y, 1-z.

**Table S5.** Selected hydrogen bond lengths (Å) and bond angles (°) of **4** (D, donor atom; A, acceptor atom).

| D-H...A       | D-H [Å] | H...A [Å] | D...A [Å] | D-H...A [°] |
|---------------|---------|-----------|-----------|-------------|
| <b>1</b>      |         |           |           |             |
| N3-H3b...O9f  | 0.86    | 2.45      | 3.05(4)   | 127         |
| N6-H6c...O4   | 0.86    | 2.41      | 3.08(3)   | 134         |
| N7-H7b...O10f | 0.86    | 2.53      | 3.34(4)   | 157         |

Symmetry code: f, -1/2-x, 1/2+y, 1-z.
